# Supplementary material for: Spen modulates lipid droplet content in adult Drosophila glial cells and protects against paraquat toxicity
Source: PubMed Central journal article supplement (PMC7674452; doi:10.1038/s41598-020-76891-9), 2020-11-18
Supplement: 41598_2020_76891_MOESM2_ESM.pdf [file 41598_2020_76891_MOESM2_ESM.pdf]

## Girard et al, Supplemental Figure 1

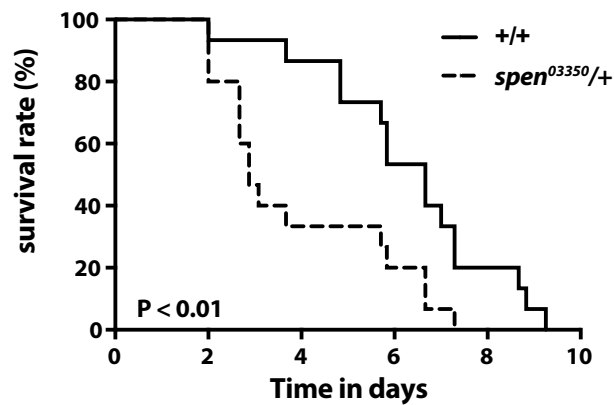

**Figure S1. *spen* heterozygous mutant flies are more sensitive to paraquat-induced lethality.** Survival rate of *spen* loss of function heterozygous mutants (*P{lacW}spen[03350]/+*) adult flies fed with paraquat (10 mM). *spen*<sup>03350</sup> heterozygous flies are more sensitive to paraquat than wild-type flies (*w1118*). Log-rank Mantel-Cox test,  $P < 0.0001$ .
