# Supplementary material for: Spen modulates lipid droplet content in adult Drosophila glial cells and protects against paraquat toxicity
Source: PubMed Central journal article supplement (PMC7674452; doi:10.1038/s41598-020-76891-9), 2020-11-18
Supplement: 41598_2020_76891_MOESM4_ESM.pdf [file 41598_2020_76891_MOESM4_ESM.pdf]

## Girard et al, Supplemental Figure 3

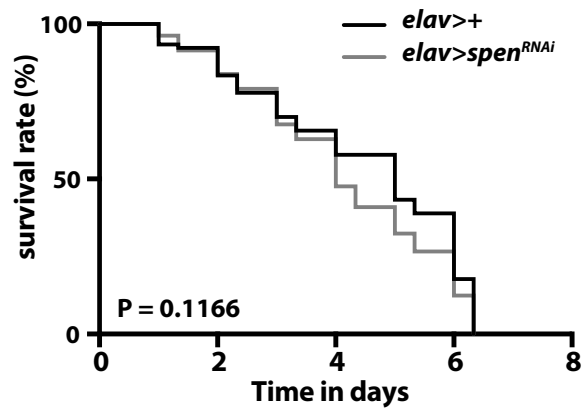

**Figure S3. Knockdown of *spen* in neurons does not enhance the fly sensitivity to paraquat treatment.**

Survival curves of adult male control flies (*elav-GAL4/+;*) or flies with glial cell-specific *spen* knockdown (*elav-GAL4 ;UAS-*spen*<sup>RNAi</sup> /+;*) fed with 20 mM paraquat. The curves represent the sum of three independent experiments with each N=20 flies per genotype. P=0.1166, not significant, by the log-rank Mantel–Cox test.
