# Supplementary material for: Spen modulates lipid droplet content in adult Drosophila glial cells and protects against paraquat toxicity
Source: PubMed Central journal article supplement (PMC7674452; doi:10.1038/s41598-020-76891-9), 2020-11-18
Supplement: 41598_2020_76891_MOESM5_ESM.pdf [file 41598_2020_76891_MOESM5_ESM.pdf]

## Girard et al, Supplemental Figure 4

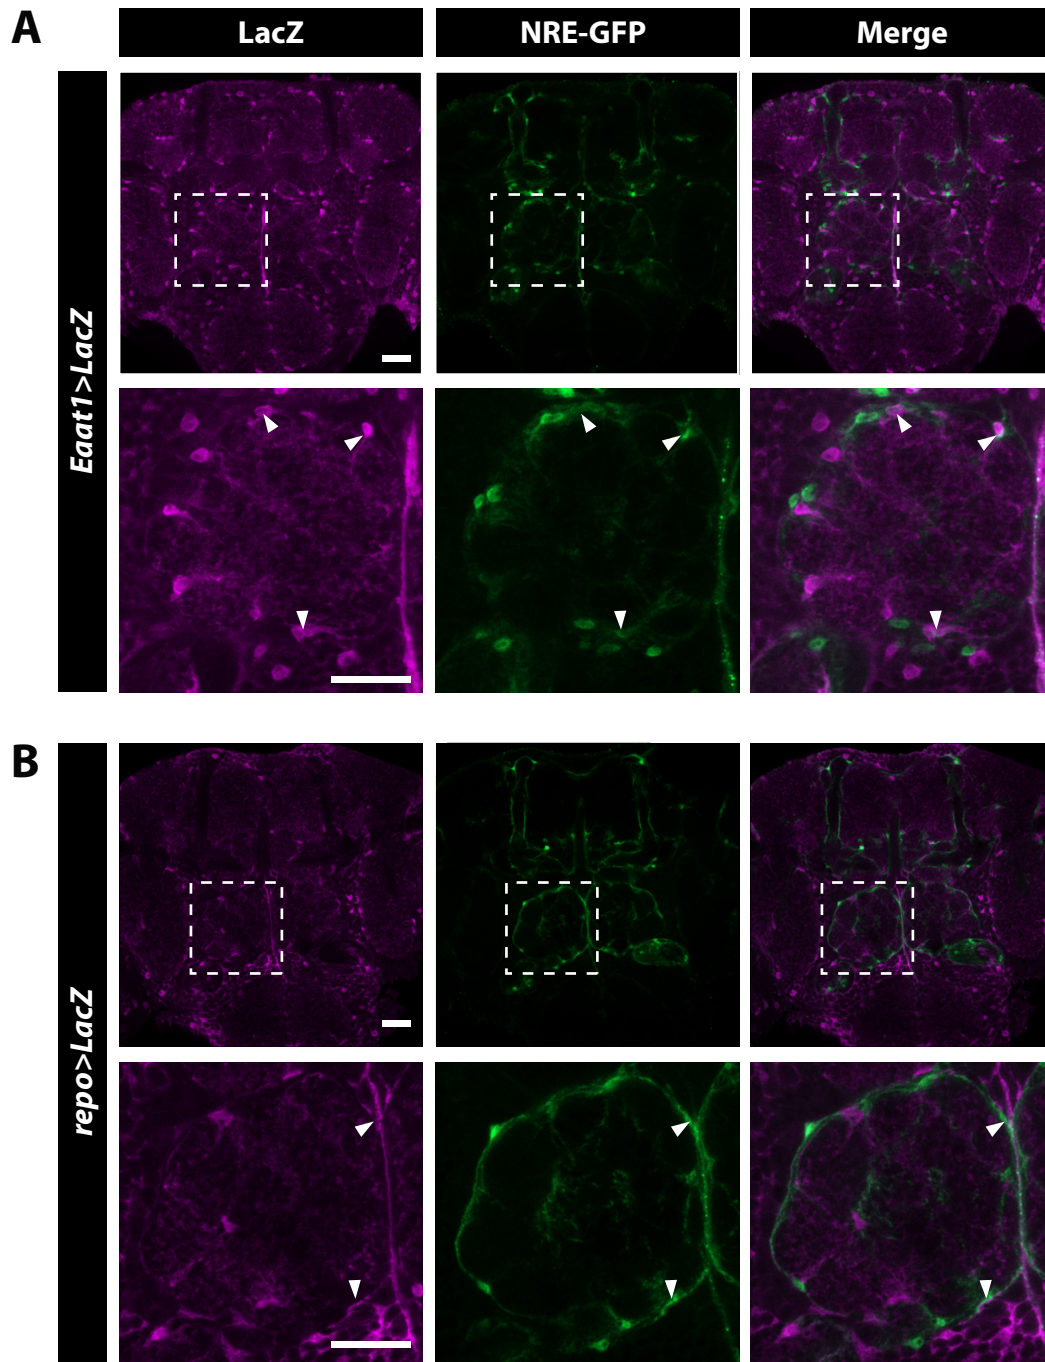

**Figure S4. Notch signaling is activated in adult *Eaat1*+ glial cells .**

Confocal microscopy of whole-mount brain of flies carrying Notch activation reporter NRE-GFP (green) expressing LacZ (magenta) under the control of glial driver *Eaat1-Gal4* (A) and *repo-Gal4* (B). NRE-GFP and LacZ co-localisation in glial cells *Eaat1* or *repo* positive is indicated with white arrowheads. Scale bar: 25 $\mu$ m.
