# Supplementary material for: Spen modulates lipid droplet content in adult Drosophila glial cells and protects against paraquat toxicity
Source: PubMed Central journal article supplement (PMC7674452; doi:10.1038/s41598-020-76891-9), 2020-11-18
Supplement: 41598_2020_76891_MOESM6_ESM.pdf [file 41598_2020_76891_MOESM6_ESM.pdf]

## Girard et al, Supplemental Figure 5

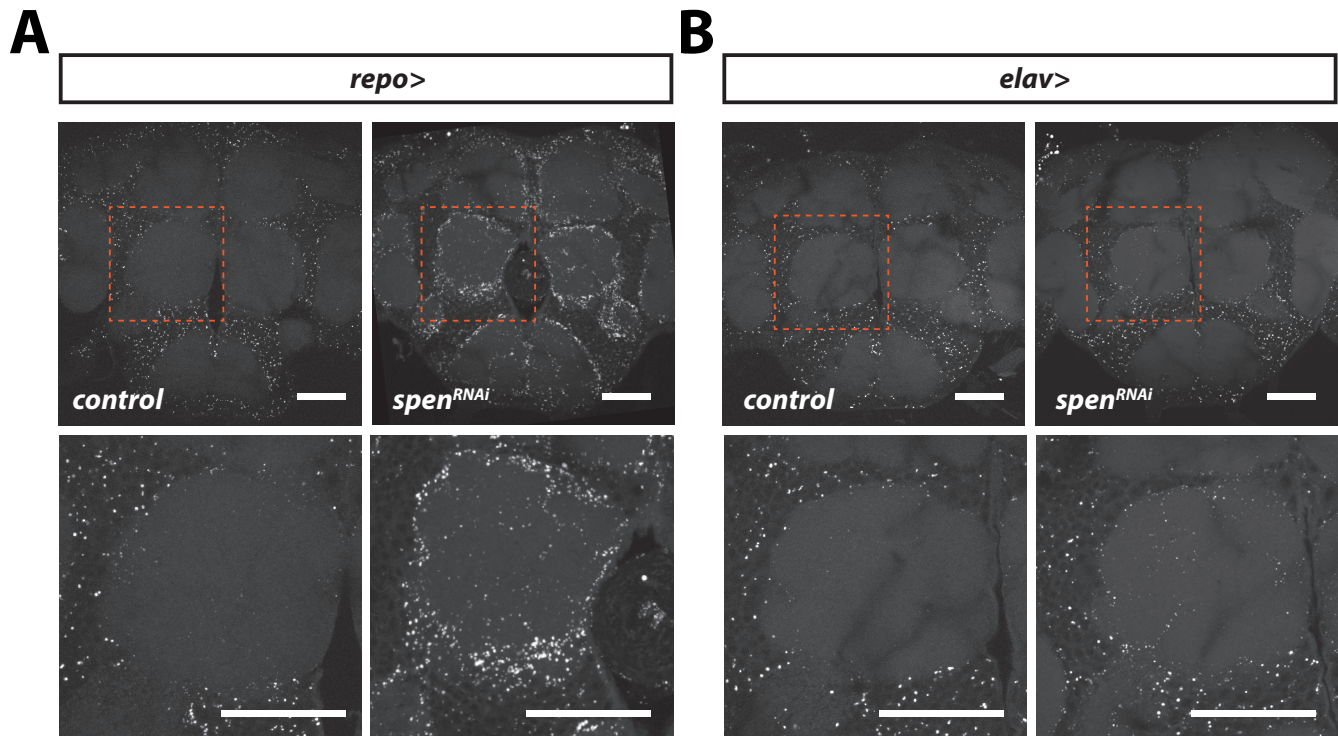

**Figure S5. Lack of *spen* in glia but not in neurons promotes lipid droplet accumulation in adult *Drosophila* brain.**

Lipid droplets labelled with BODIPY 493/503 (white dots) in whole-mount brain of flies expressing *spen<sup>RNAi</sup>* specifically in glia (**A**, *repo-GAL4*) or neurons (**B**, *elav-GAL4*) compare to their respective control. As shown in the close-up, lipid droplets are accumulating in the neuropil area of the antennal lobe only flies lacking *spen* in glia but not in neurons. Scale bar: 25 $\mu$ m.
